# Supplementary material for: Exploring Metabolic Characteristics in Different Geographical Locations and Yields of Nicotiana tabacum L. Using Gas Chromatography–Mass Spectrometry Pseudotargeted Metabolomics Combined with Chemometrics
Source: MDPI journal article supplement (doi:10.3390/metabo14040176), 2024-03-22
Supplement: s1 [file s1]

**Table S1. Sample Information.**

| Type               | Sample      | Duplicates | yeild        | Locations                       | Latitude and longitude     | Altitude(m) | Average annual temperature(°C) | Average annual rainfall (mm) | Average annual humidity (%) | Average annual sunshine(hr) |
|--------------------|-------------|------------|--------------|---------------------------------|----------------------------|-------------|--------------------------------|------------------------------|-----------------------------|-----------------------------|
| Light-flavor       | Shuicheng-H | 6          | High-yield   | Yanjing, Shuicheng, Liupanshui. | 26.4368600,<br>104.9761170 | 1800        | 12.9                           | 144.6                        | 78.75                       | 144.4                       |
|                    | Shuicheng-M | 6          | Middle-yield |                                 |                            |             |                                |                              |                             |                             |
|                    | Shuicheng-L | 6          | Low-yield    |                                 |                            |             |                                |                              |                             |                             |
| Sweet honey-flavor | Bozhou-H    | 6          | High-yield   | Yingtaojing, Leshan, Bozhou.    | 27.725654,<br>106.927389   | 993.2       | 15.3                           | 148.3                        | 78.08                       | 114.1                       |
|                    | Bozhou-M    | 6          | Middle-yield |                                 |                            |             |                                |                              |                             |                             |
|                    | Bozhou-L    | 6          | Low-yield    |                                 |                            |             |                                |                              |                             |                             |

| Table S2 List of 121 identified metabolites from 21 chemical classifications detected with pseudotargeted GC-MS based metabolomics in tobacco leaves |                         |          |                |        |      |                  |                     |            |                  |                  |                 |                 |
|------------------------------------------------------------------------------------------------------------------------------------------------------|-------------------------|----------|----------------|--------|------|------------------|---------------------|------------|------------------|------------------|-----------------|-----------------|
| Metabolites                                                                                                                                          | Chemical classification | RT (min) | Identification | RI     | RRI  | Percent RI error | Derivatization type | CAS Number | Quantitative ion | Confirmative ion | Intra-day RSD/% | Inter-day RSD/% |
| Short-chain fatty acid                                                                                                                               |                         |          |                |        |      |                  |                     |            |                  |                  |                 |                 |
| Pyruvic acid                                                                                                                                         | Short-chain fatty acid  | 14.584   | Standard       | 1052   | 1045 | -0.7%            | 1MEOX;1TMS          | 127-17-3   | 174              | 115;73           | 13.56           | 19.88           |
| Lactic acid                                                                                                                                          | Short-chain fatty acid  | 14.917   | Standard       | 1064   | 1054 | -0.9%            | 2TMS                | 50-21-5    | 117              | 147;219          | 10.85           | 15.16           |
| Glycolic acid                                                                                                                                        | Short-chain fatty acid  | 15.37    | Standard       | 1078   | 1073 | -0.5%            | 2TMS                | 79-14-1    | 147              | 177;120          | 6.58            | 9.89            |
| 4-Hydroxybutanoic acid                                                                                                                               | Short-chain fatty acid  | 20.081   | —              | 1239   | 1230 | -0.7%            | 2TMS                | 591-81-1   | 233              | 204;147          | 2.54            | 4.43            |
| Long-chain fatty acid                                                                                                                                |                         |          |                |        |      |                  |                     |            |                  |                  |                 |                 |
| Stearic acid                                                                                                                                         | Long-chain fatty acid   | 43.995   | Standard       | 2248   | 2247 | 0.0%             | 1TMS                | 57-11-4    | 341              | 356;117          | 5.85            | 9.12            |
| Oleic acid                                                                                                                                           | Long-chain fatty acid   | 43.544   | Standard       | 2223   | 2224 | 0.0%             | 1TMS                | 112-80-1   | 339              | 129;264          | 7.85            | 10.54           |
| Myristic acid                                                                                                                                        | Long-chain fatty acid   | 34.834   | Standard       | 1851   | 1843 | -0.4%            | 1TMS                | 544-63-8   | 285              | 204;117          | 7.58            | 10.25           |
| Linoleic acid                                                                                                                                        | Long-chain fatty acid   | 43.555   | Standard       | 2221.8 | 2199 | -0.5%            | 1 TMS               | 60-33-3    | 335              | 321;350          | 6.78            | 12.35           |
| Short-chain amine                                                                                                                                    |                         |          |                |        |      |                  |                     |            |                  |                  |                 |                 |
| Ethanolamine                                                                                                                                         | Short-chain amine       | 21.056   | Standard       | 1275   | 1275 | 0.0%             | 3TMS                | 141-43-5   | 174              | 262;147          | 3.09            | 7.03            |
| n-Butylamine                                                                                                                                         | Short-chain amine       | 16.365   | Standard       | 1112   | 1115 | 0.3%             | 2TMS                | 109-73-9   | 174              | 202;128          | 13.52           | 19.58           |
| Isoamylamine                                                                                                                                         | Short-chain amine       | 17.82    | Standard       | 1162   | —    | —                | 2TMS                | 107-85-7   | 174              | 216;142          | 5.85            | 8.12            |
| Amino acid                                                                                                                                           |                         |          |                |        |      |                  |                     |            |                  |                  |                 |                 |
| Glycine                                                                                                                                              | Amino acid              | 16.684   | Standard       | 1124   | 1135 | 1.0%             | 2TMS                | 56-40-6    | 102              | 147;204          | 12.58           | 18.33           |
| Alanine                                                                                                                                              | Amino acid              | 16.215   | Standard       | 1108   | 1110 | 0.2%             | 2TMS                | 56-41-7    | 116              | 190;147          | 4.98            | 9.68            |
| Leucine                                                                                                                                              | Amino acid              | 21.168   | Standard       | 1279   | 1279 | 0.0%             | 2TMS                | 61-90-5    | 158              | 218;232          | 11.42           | 15.27           |
| Valine                                                                                                                                               | Amino acid              | 19.597   | Standard       | 1223   | 1225 | 0.2%             | 2TMS                | 72-18-4    | 144              | 218;246          | 9.34            | 12.45           |
| Isoleucine                                                                                                                                           | Amino acid              | 21.789   | Standard       | 1302   | 1302 | 0.0%             | 2TMS                | 73-32-5    | 158              | 218;232          | 8.98            | 16.48           |
| Proline                                                                                                                                              | Amino acid              | 21.914   | Standard       | 1306   | 1304 | -0.2%            | 2TMS                | 147-85-3   | 142              | 216;244          | 8.56            | 16.38           |
| Serine                                                                                                                                               | Amino acid              | 23.629   | Standard       | 1371   | 1369 | -0.1%            | 3TMS                | 56-45-1    | 204              | 218;278          | 10.02           | 14.58           |
| Pipecolinic acid                                                                                                                                     | Amino acid              | 23.801   | Standard       | 1375   | 1367 | -0.6%            | 2TMS                | 4043-87-2  | 156              | 230;73           | 9.23            | 11.5            |
| Threonine                                                                                                                                            | Amino acid              | 24.429   | Standard       | 1398   | 1398 | 0.0%             | 3TMS                | 72-19-5    | 218              | 291;117          | 6.54            | 13.88           |

|                         |                   |        |          |      |      |       |             |           |     |          |       |       |
|-------------------------|-------------------|--------|----------|------|------|-------|-------------|-----------|-----|----------|-------|-------|
| Aspartic acid           | Amino acid        | 27.815 | Standard | 1532 | 1530 | -0.1% | 3TMS        | 56-84-8   | 232 | 218;202  | 8.58  | 14.12 |
| Pyroglutamic acid       | Amino acid        | 27.821 | Standard | 1536 | 1524 | -0.8% | 2TMS        | 98-79-3   | 156 | 258;230  | 14.48 | 23.57 |
| Gamma-aminobutyric acid | Amino acid        | 27.95  | Standard | 1542 | 1542 | 0.0%  | 3TMS        | 56-12-2   | 174 | 304;147  | 8.79  | 12.89 |
| Glutamic acid           | Amino acid        | 30.05  | Standard | 1631 | 1629 | -0.1% | 3TMS        | 56-86-0   | 246 | 348;147  | 7.22  | 9.68  |
| Phenylalanine           | Amino acid        | 30.31  | Standard | 1643 | 1640 | -0.2% | 2TMS        | 63-91-2   | 218 | 192;266  | 6.89  | 9.24  |
| Asparagine              | Amino acid        | 31.309 | Standard | 1686 | 1686 | 0.0%  | 3TMS        | 70-47-3   | 231 | 188;132  | 9.86  | 14.87 |
| Glutamine               | Amino acid        | 33.55  | Standard | 1786 | 1771 | -0.8% | 3TMS        | 56-85-9   | 347 | 245;156  | 8.57  | 14.03 |
| Lysine                  | Amino acid        | 36.599 | Standard | 1931 | 1941 | 0.5%  | 3TMS        | 56-87-1   | 317 | 174;230  | 15.47 | 21.67 |
| Tyrosine                | Amino acid        | 37.032 | Standard | 1957 | 1958 | 0.1%  | 3TMS        | 60-18-4   | 218 | 280;354  | 10.58 | 13.54 |
| 5-Hydroxytryptophan     | Amino acid        | 45.65  | —        | 2328 | 2460 | 0.0%  | 4 TMS       | 56-69-9   | 290 | 202;218  | 9.14  | 15.45 |
| Tryptophan              | Amino acid        | 44.022 | Standard | 2248 | 2237 | 0.8%  | 3 TMS       | 73-22-3   | 291 | 202;218  | 13.23 | 16.24 |
| Histidine               | Amino acid        | 36.71  | Standard | 1941 | 1941 | -0.1% | 3 TMS       | 71-00-1   | 154 | 254; 356 | 8.79  | 11.05 |
| Glutmic acid            | Amino acid        | 30.067 | Standard | 1630 | 1629 | -0.8% | 3 TMS       | 6899/5/4  | 246 | 348; 147 | 9.67  | 16.23 |
| Hydroxyproline          | Amino acid        | 27.973 | Standard | 1540 | 1546 | -0.6% | 3 TMS       | 51-35-4   | 332 | 140; 230 | 13.45 | 19.89 |
| Methionine              | Amino acid        | 27.727 | Standard | 1531 | 1531 | 0.0%  | 2 TMS       | 63-68-3   | 176 | 147; 128 | 15.85 | 17.28 |
| Ornithine               | Amino acid        | 34.52  | Standard | 1836 | 1814 | 0.1%  | 4 TMS       | 70-26-8   | 142 | 174; 73  | 6.79  | 12.35 |
| Dicarboxylic acid       |                   |        |          |      |      |       |             |           |     |          |       |       |
| Oxalic acid             | Dicarboxylic acid | 17.06  | Standard | 1137 | 1133 | -0.4% | 2TMS        | 144-62-7  | 147 | 190;219  | 18.58 | 28.93 |
| Maleic acid             | Dicarboxylic acid | 22.104 | Standard | 1313 | 1310 | -0.2% | 2TMS        | 110-16-7  | 147 | 245;133  | 15.85 | 21.58 |
| Succinic acid           | Dicarboxylic acid | 22.243 | Standard | 1317 | 1318 | 0.1%  | 2TMS        | 110-15-6  | 247 | 218;129  | 13.25 | 15.49 |
| Fumaric acid            | Dicarboxylic acid | 23.086 | Standard | 1349 | 1346 | -0.2% | 2TMS        | 110-17-8  | 245 | 147;73   | 7.12  | 12.95 |
| Malic acid              | Dicarboxylic acid | 26.93  | Standard | 1499 | 1484 | -1.0% | 3TMS        | 6915-15-7 | 233 | 245;147  | 9.86  | 15.52 |
| 2-Ketoglutaric acid     | Dicarboxylic acid | 29.016 | Standard | 1586 | 1589 | -0.2% | 1 MOX 2 TMS | 328-50-7  | 198 | 288; 304 | 16.75 | 18.24 |
| Tartaric acid           | Dicarboxylic acid | 29.865 | Standard | 1620 | 1622 | 0.0%  | 5 TMS       | 526-83-0  | 292 | 219;423  | 6.98  | 12.34 |
| Saccharides             |                   |        |          |      |      |       |             |           |     |          |       |       |
| Glyceraldehyde          | Monosaccharide    | 19.405 | Standard | 1217 | 1207 | -0.8% | 1MEOX;2TMS  | 367-47-5  | 147 | 103;133  | 21.58 | 28.98 |
| Erythrose               | Monosaccharide    | 26.154 | Standard | 1469 | 1459 | -0.7% | 1MEOX;3TMS  | 583-50-6  | 205 | 147;117  | 4.52  | 7.58  |



|                 |            |        |          |      |      |       |       |           |     |          |       |        |
|-----------------|------------|--------|----------|------|------|-------|-------|-----------|-----|----------|-------|--------|
| Galactonic acid | Sugar acid | 38.665 | Standard | 2030 | 2039 | 0.4%  | 6TMS  | 576-36-3  | 217 | 147;292  | 18.78 | 23.75  |
| Gluconic acid   | Sugar acid | 38.878 | Standard | 2039 | 2037 | -0.1% | 6TMS  | 526-95-4  | 333 | 217;292  | 12.12 | 14.23  |
| Galactaric acid | Sugar acid | 39.984 | Standard | 2084 | 2073 | 0.6%  | 6 TMS | 526-99-8  | 333 | 292;423  | 6.78  | 9.46   |
| Glucaric acid   | Sugar acid | 34.597 | Standard | 1839 | 1844 | 0.0%  | 6 TMS | 87-73-0   | 333 | 292;305  | 8.67  | 6.78   |
| Threonic acid   | Sugar acid | 28.85  | Standard | 1579 | 1545 | 0.0%  | 4 TMS | 7306-96-9 | 292 | 205;220  | 7.25  | 12.778 |
| 5C sugar acid   | Sugar acid | 33.386 | —        | 1781 | —    | 0.1%  | 5 TMS | —         | 292 | 217;147  | 4.67  | 8.25   |
| 6C sugar acid   | Sugar acid | 39.253 | —        | 2053 | —    | -0.2% | 6 TMS | —         | 292 | 217; 333 | 6.67  | 10.25  |
| 6C sugar acid1  | Sugar acid | 38.773 | —        | —    | —    | 0.3%  | —     | —         | 292 | 217; 333 | 11.25 | 13.26  |
| 6C sugar acid2  | Sugar acid | 37.373 | —        | —    | —    | 0.8%  | 6 TMS | —         | 333 | 217;205  | 14.33 | 16.38  |

Sugar alcohol

|              |               |        |          |      |      |       |       |           |     |         |       |       |
|--------------|---------------|--------|----------|------|------|-------|-------|-----------|-----|---------|-------|-------|
| Mannitol     | Sugar alcohol | 37.173 | Standard | 1965 | 1969 | 0.2%  | 6TMS  | 69-65-8   | 319 | 205;147 | 9.01  | 11.35 |
| Sorbitol     | Sugar alcohol | 37.347 | Standard | 1973 | 1988 | 0.8%  | 6TMS  | 50-70-4   | 319 | 217;205 | 10.56 | 11.87 |
| Threitol     | Sugar alcohol | 27.577 | —        | 1523 | 1529 | 0.4%  | 4TMS  | 7493-90-5 | 217 | 189;205 | 8.52  | 11.28 |
| Erythritol   | Sugar alcohol | 27.4   | Standard | 1520 | 1525 | 0.3%  | 4TMS  | 149-32-6  | 147 | 117;205 | 5.14  | 6.36  |
| Xylitol      | Sugar alcohol | 31.658 | Standard | 1702 | 1703 | 0.1%  | 5TMS  | 87-99-0   | 103 | 217;307 | 8.47  | 10.68 |
| Arabinitol   | Sugar alcohol | 32.614 | Standard | 1744 | 1759 | 0.9%  | 5TMS  | 488-82-4  | 217 | 103;307 | 3.58  | 5.21  |
| Myo-Inositol | Sugar alcohol | 41.249 | Standard | 2132 | 2130 | -0.1% | 6TMS  | 87-89-8   | 305 | 318;265 | 4.45  | 7.8   |
| Galactiol    | Sugar alcohol | 37.7   | Standard | 1995 | —    | -0.7% | 6 TMS | 608-66-2  | 319 | 205;244 | 5.28  | 6.56  |

Phenolic acid

|                               |               |        |          |      |      |       |       |            |     |          |      |       |
|-------------------------------|---------------|--------|----------|------|------|-------|-------|------------|-----|----------|------|-------|
| Salicylic acid                | Phenolic acid | 28.735 | Standard | 1575 | 1561 | -0.9% | 2TMS  | 69-72-7    | 267 | 193;223  | 8.69 | 13.32 |
| <i>p</i> -Hydroxybenzoic acid | Phenolic acid | 30.191 | Standard | 1637 | 1636 | -0.1% | 2TMS  | 99-96-7    | 267 | 223;193  | 5.98 | 8.12  |
| Protocatechuic acid           | Phenolic acid | 34.53  | Standard | 1835 | 1835 | 0.0%  | 3TMS  | 99-50-3    | 193 | 370;355  | 5.75 | 8.42  |
| Caffeic acid                  | Phenolic acid | 41.789 | Standard | 2152 | 2152 | -0.2% | 3 TMS | 331-39-5   | 396 | 219;381  | 4.34 | 6.25  |
| Caffeoylputrescine            | Phenolic acid | 65.992 | Standard | 3441 | —    | 0.5%  | —     | 29554-26-5 | 174 | 307; 523 | 6.67 | 9.23  |
| Caffeoylquinic acid           | Phenolic acid | 62.355 | Standard | 3255 | 3140 | 0.0%  | 6TMS  | 1241-87-8  | 345 | 307;255  | 7.48 | 14.23 |

Phosphate esters and phosphates

|                          |                  |        |          |      |      |      |             |            |     |             |       |       |
|--------------------------|------------------|--------|----------|------|------|------|-------------|------------|-----|-------------|-------|-------|
| Glycerol-3-phosphate     | Phosphate esters | 33.457 | Standard | 1783 | 1796 | 0.7% | 4TMS        | 57-03-4    | 330 | 299;357     | 11.68 | 18.89 |
| Phosphoethanolamine      | Phosphate esters | 33.902 | —        | 1806 | 1809 | 0.2% | 4TMS        | 1071-23-4  | 299 | 370;315     | 23.58 | 30.89 |
| Glycerophosphoglycerol   | Phosphate esters | 43.775 | Standard | 2238 | —    | —    | 5TMS        | 6418-92-4  | 357 | 445;503     | 13.16 | 19.85 |
| myo-Inositol-1-phosphate | Phosphate esters | 59.163 | —        | 3071 | 3063 | 0.0% | 9TMS        | 15421-51-9 | 204 | 217;366     | 12.11 | 16.34 |
| Glucuronic acid          | Phosphate esters | 47.145 | Standard | —    | —    | 0.1% | —           | 576-37-4   | 292 | 305;217     | 9.89  | 13.45 |
| Hexophosphate            | Phosphate esters | 46.801 | Standard | 2373 | 2367 | 0.7% | —           |            | 387 | 471; 299    | 6.45  | 18.46 |
| Glucose 6-phosphate      | Phosphate esters | 46.457 | —        | 2373 | 2375 | 0.5% | 6 TMS       | 56-73-5    | 387 | 315;299     | 7.12  | 12.65 |
| Fructose-6-phosphate     | Phosphate esters | 46.255 | —        | 2360 | 2362 | 0.0% | 1 MOX 6 TMS | 6814-87-5  | 387 | 299;217;315 | 5.56  | 12.34 |
| Monomethyl phosphate     | Phosphate esters | 18.45  | Standard | 1183 | 1184 | 0.1% | 2TMS        |            | 241 | 256;211     | 13.16 | 19.85 |

(Poly)hydroxy carboxylic acid

|                            |                               |        |          |      |               |       |       |            |     |          |       |       |
|----------------------------|-------------------------------|--------|----------|------|---------------|-------|-------|------------|-----|----------|-------|-------|
| Quinic acid                | (Poly)hydroxy carboxylic acid | 35.651 | Standard | 1891 | 1900          | 0.5%  | 5TMS  | 77-95-2    | 345 | 255;435  | 6.53  | 24.47 |
| Glyceric acid              | (Poly)hydroxy carboxylic acid | 22.829 | Standard | 1341 | 1344          | 0.2%  | 3TMS  | 473-81-4   | 189 | 133;292  | 8.12  | 11.59 |
| Ribonic acid               | (Poly)hydroxy carboxylic acid | 33.28  | —        | 1779 | 1779          | 0.0%  | 5TMS  | 17812-24-7 | 292 | 333;307  | 11.39 | 12.69 |
| Shikimic acid              | (Poly)hydroxy carboxylic acid | 34.253 | Standard | 1824 | 1809          | -0.8% | 4TMS  | 138-59-0   | 204 | 357;255  | 8.58  | 10.23 |
| 3-Hydroxy glutaric acid    | (Poly)hydroxy carboxylic acid | 28.978 | —        | 1587 | 1590          | 0.8%  | 3 TMS | 533-62-0   | 129 | 247;349  | 6.56  | 9.78  |
| Isocitric acid/Citric acid | (Poly)hydroxy carboxylic acid | 34.635 | Standard | 1841 | 1805/<br>1803 | 0.0%  | 4 TMS | 77-92-9    | 273 | 347; 363 | 11.25 | 15.45 |

Sterol

|                 |        |        |          |      |      |       |      |         |     |         |       |       |
|-----------------|--------|--------|----------|------|------|-------|------|---------|-----|---------|-------|-------|
| Stigmasterol    | Sterol | 66.78  | Standard | 3480 | 3445 | -1.0% | 1TMS | 83-48-7 | 343 | 394;484 | 12.46 | 19.68 |
| Beta-Sitosterol | Sterol | 68.065 | Standard | 3546 | 3509 | -1.0% | 1TMS | 83-46-5 | 255 | 396;381 | 15.89 | 24.85 |

Biogenic amine

|                |                |        |          |        |      |       |       |          |     |         |       |       |
|----------------|----------------|--------|----------|--------|------|-------|-------|----------|-----|---------|-------|-------|
| Putrescine     | Biogenic amine | 32.81  | Standard | 1757   | 1739 | -1.0% | 4TMS  | 110-60-1 | 174 | 214;200 | 10.85 | 24.25 |
| Tyramine       | Biogenic amine | 36.464 | Standard | 1930.5 | 1933 | 0.0%  | 2 TMS | 60-19-5  | 338 | 174;86  | 14.23 | 16.55 |
| Phenethylamine | Biogenic amine | 28.87  | Standard | 1580.8 | 1568 | 0.5%  | 2 TMS | 64-04-0  | 174 | 250;86  | 10.11 | 14.23 |
| Isopentylamine | Biogenic amine | 17.826 | Standard | 1161   | —    | 0.0%  | 2 TMS | 107-85-7 | 174 | 216;142 | 5.23  | 20.56 |

Polyalcohol

|                |             |        |   |      |      |       |      |          |     |         |      |       |
|----------------|-------------|--------|---|------|------|-------|------|----------|-----|---------|------|-------|
| 2,3-Butanediol | Polyalcohol | 14.388 | — | 1045 | 1040 | -0.5% | 2TMS | 513-85-9 | 117 | 147;133 | 8.56 | 13.57 |
|----------------|-------------|--------|---|------|------|-------|------|----------|-----|---------|------|-------|

|                              |              |        |          |      |      |       |       |            |     |          |       |       |
|------------------------------|--------------|--------|----------|------|------|-------|-------|------------|-----|----------|-------|-------|
| Glycerol                     | Polyalcohol  | 21.236 | Standard | 1282 | 1282 | 0.0%  | 3TMS  | 56-81-5    | 117 | 147;205  | 2.18  | 6.02  |
| Vitamin                      |              |        |          |      |      |       |       |            |     |          |       |       |
| Tocopherol                   | Vitamin      | 62.159 | Standard | 3245 | 3156 | -1.0% | 1TMS  | 1406-18-4  | 502 | 237;277  | 7.56  | 9.45  |
| Ascorbic acid                | Vitamin      | 35.335 | Standard | 1875 | 1946 | 1.0%  | 4 TMS | 299-36-5   | 173 | 157; 316 | 9.23  | 15.34 |
| Nucleobase                   |              |        |          |      |      |       |       |            |     |          |       |       |
| Guanine                      | Nucleobase   | 41.727 | Standard | 2150 | 2128 | -1.0% | 3TMS  | 73-40-7    | 352 | 367;73   | 24.87 | 32.85 |
| Adenine                      | Nucleobase   | 35.556 | Standard | 1888 | 1876 | 0.5%  | 2 TMS | 73-24-5    | 264 | 279;192  | 12.34 | 18.67 |
| Terpene                      |              |        |          |      |      |       |       |            |     |          |       |       |
| Phytol                       | Terpene      | 42.521 | Standard | 2181 | 2181 | 0.7%  | 1 TMS | 150-86-7   | 143 | 123;353  | 16.78 | 20.89 |
| Other                        |              |        |          |      |      |       |       |            |     |          |       |       |
| Urea                         | Other        | 18.641 | Standard | 1192 | 1194 | 0.2%  | 3TMS  | 57-13-6    | 147 | 171;261  | 13.37 | 17.23 |
| Glycolactone                 |              |        |          |      |      |       |       |            |     |          |       |       |
| L-Mannonic acid gama-lactone | glycolactone | 37.631 | —        | 1993 | 2012 | 0.1%  | 4 TMS | 22430-23-5 | 217 | 361;204  | 19.89 | 21.23 |
| L-Arabonic acid-1,4-lactone  | glycolactone | 30.545 | —        | 1653 | 1665 | 0.3%  | 3 TMS | 51532-86-6 | 217 | 349;364  | 13.45 | 18.89 |
| L-Xylonic acid-1,4-lactone   | glycolactone | 30.461 | —        | 1648 | 1647 | 0.0%  | 3 TMS | 68035-75-6 | 217 | 349;364  | 6.89  | 10.28 |
| Erythrono-1,4-lactone        | glycolactone | 24.074 | —        | 1388 | 1427 | 0.7%  | 2 TMS | 15667-21-7 | 262 | 247;147  | 5.54  | 9.98  |
| Alkaloid                     |              |        |          |      |      |       |       |            |     |          |       |       |
| Nicotinne                    | alkaloid     | 23.38  | Standard | 1361 | —    | 0.5%  | —     | 54-11-5    | 84  | 133;162  | 7.06  | 11.38 |
| Nornicotine                  | alkaloid     | 27.91  | Standard | 1540 | —    | 0.0%  | 1 TMS | 494-97-3   | 220 | 205;142  | 6.45  | 8.98  |
| Nicotinic qcid               | alkaloid     | 21.69  | Standard | 1298 | 1298 | 1.0%  | 1 TMS | 59-67-6    | 180 | 136;106  | 10.38 | 15.35 |

Standard, mass spectrometry database (NIST14 and Willy08 library), linear retention index; mass spectrometry database (NIST14 and Willy08 library), linear retention index and literatures

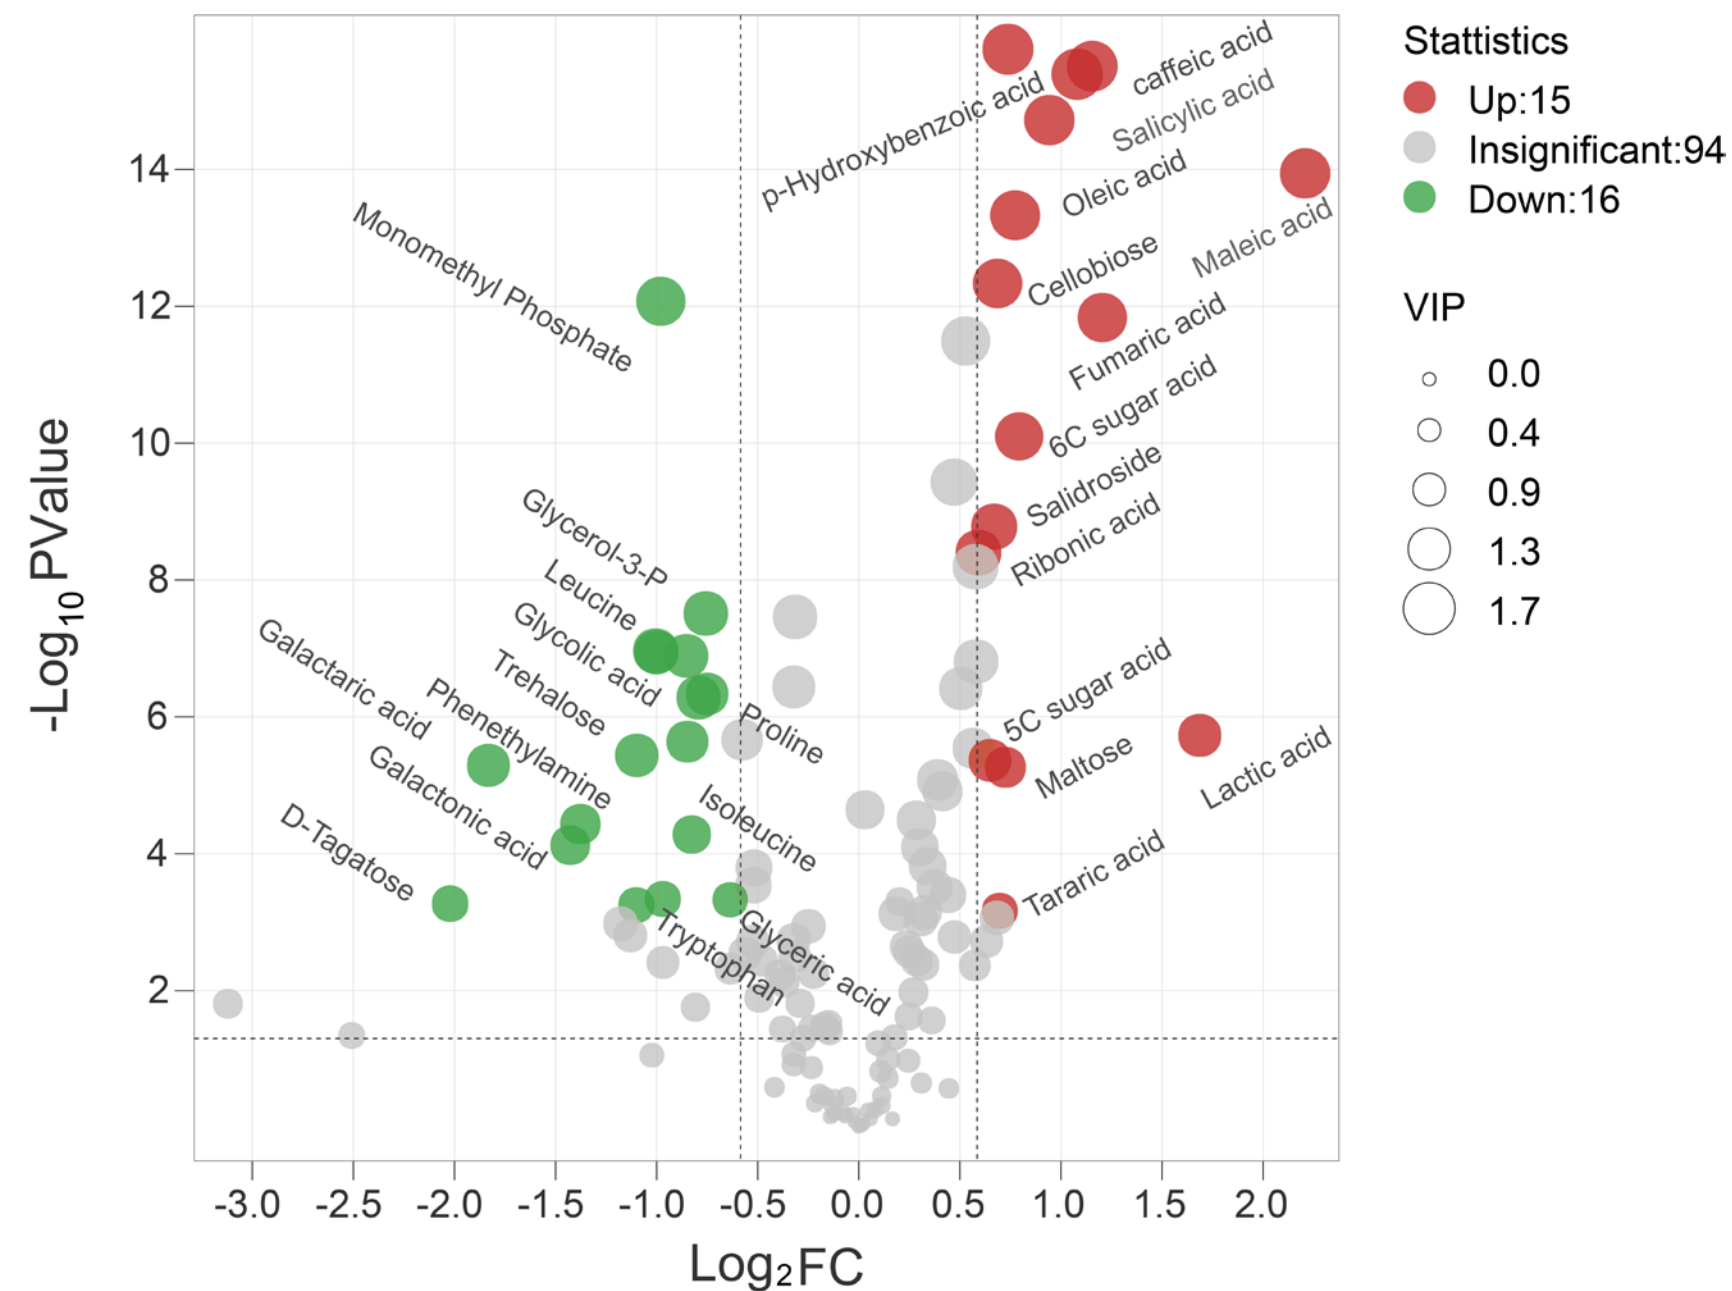

**Figure S1.** Characteristic Metabolite Volcano Map. P value < 0.05, FC >1.5, VIP >1.2. (Salicylic acid VIP=1.72, p-Hydroxybenzoic acid VIP=1.70, Caffeic acid VIP=1.69, Maleic acid VIP=1.68, Oleic acid VIP=1.68, *L*-arabonic acid-1,4-lactone VIP=1.66, Fumaric acid VIP=1.64, Cellobiose VIP=1.63, Monomethyl Phosphate VIP=1.62, 6C sugar acid VIP=1.58, Salidroside VIP=1.48, Ribonic acid VIP=1.47, Glycerol-3-P VIP=1.42, Glycolic acid VIP=1.39, Leucine VIP=1.38, fructose-6-phosphate VIP=1.38, Trehalose VIP=1.36, Lactic acid VIP=1.35, Galactaric acid VIP=1.35, Proline VIP=1.33, 5C sugar acid VIP=1.32, glucose-6-phosphate VIP=1.3, Maltose VIP=1.26, Tartaric acid VIP=1.24, Phenethylamine VIP=1.23, Isoleucine VIP=1.22, Galactonic acid VIP=1.22, D-Tagatose VIP=1.21, Tryptophan VIP=1.20, Glyceric acid VIP=1.20).



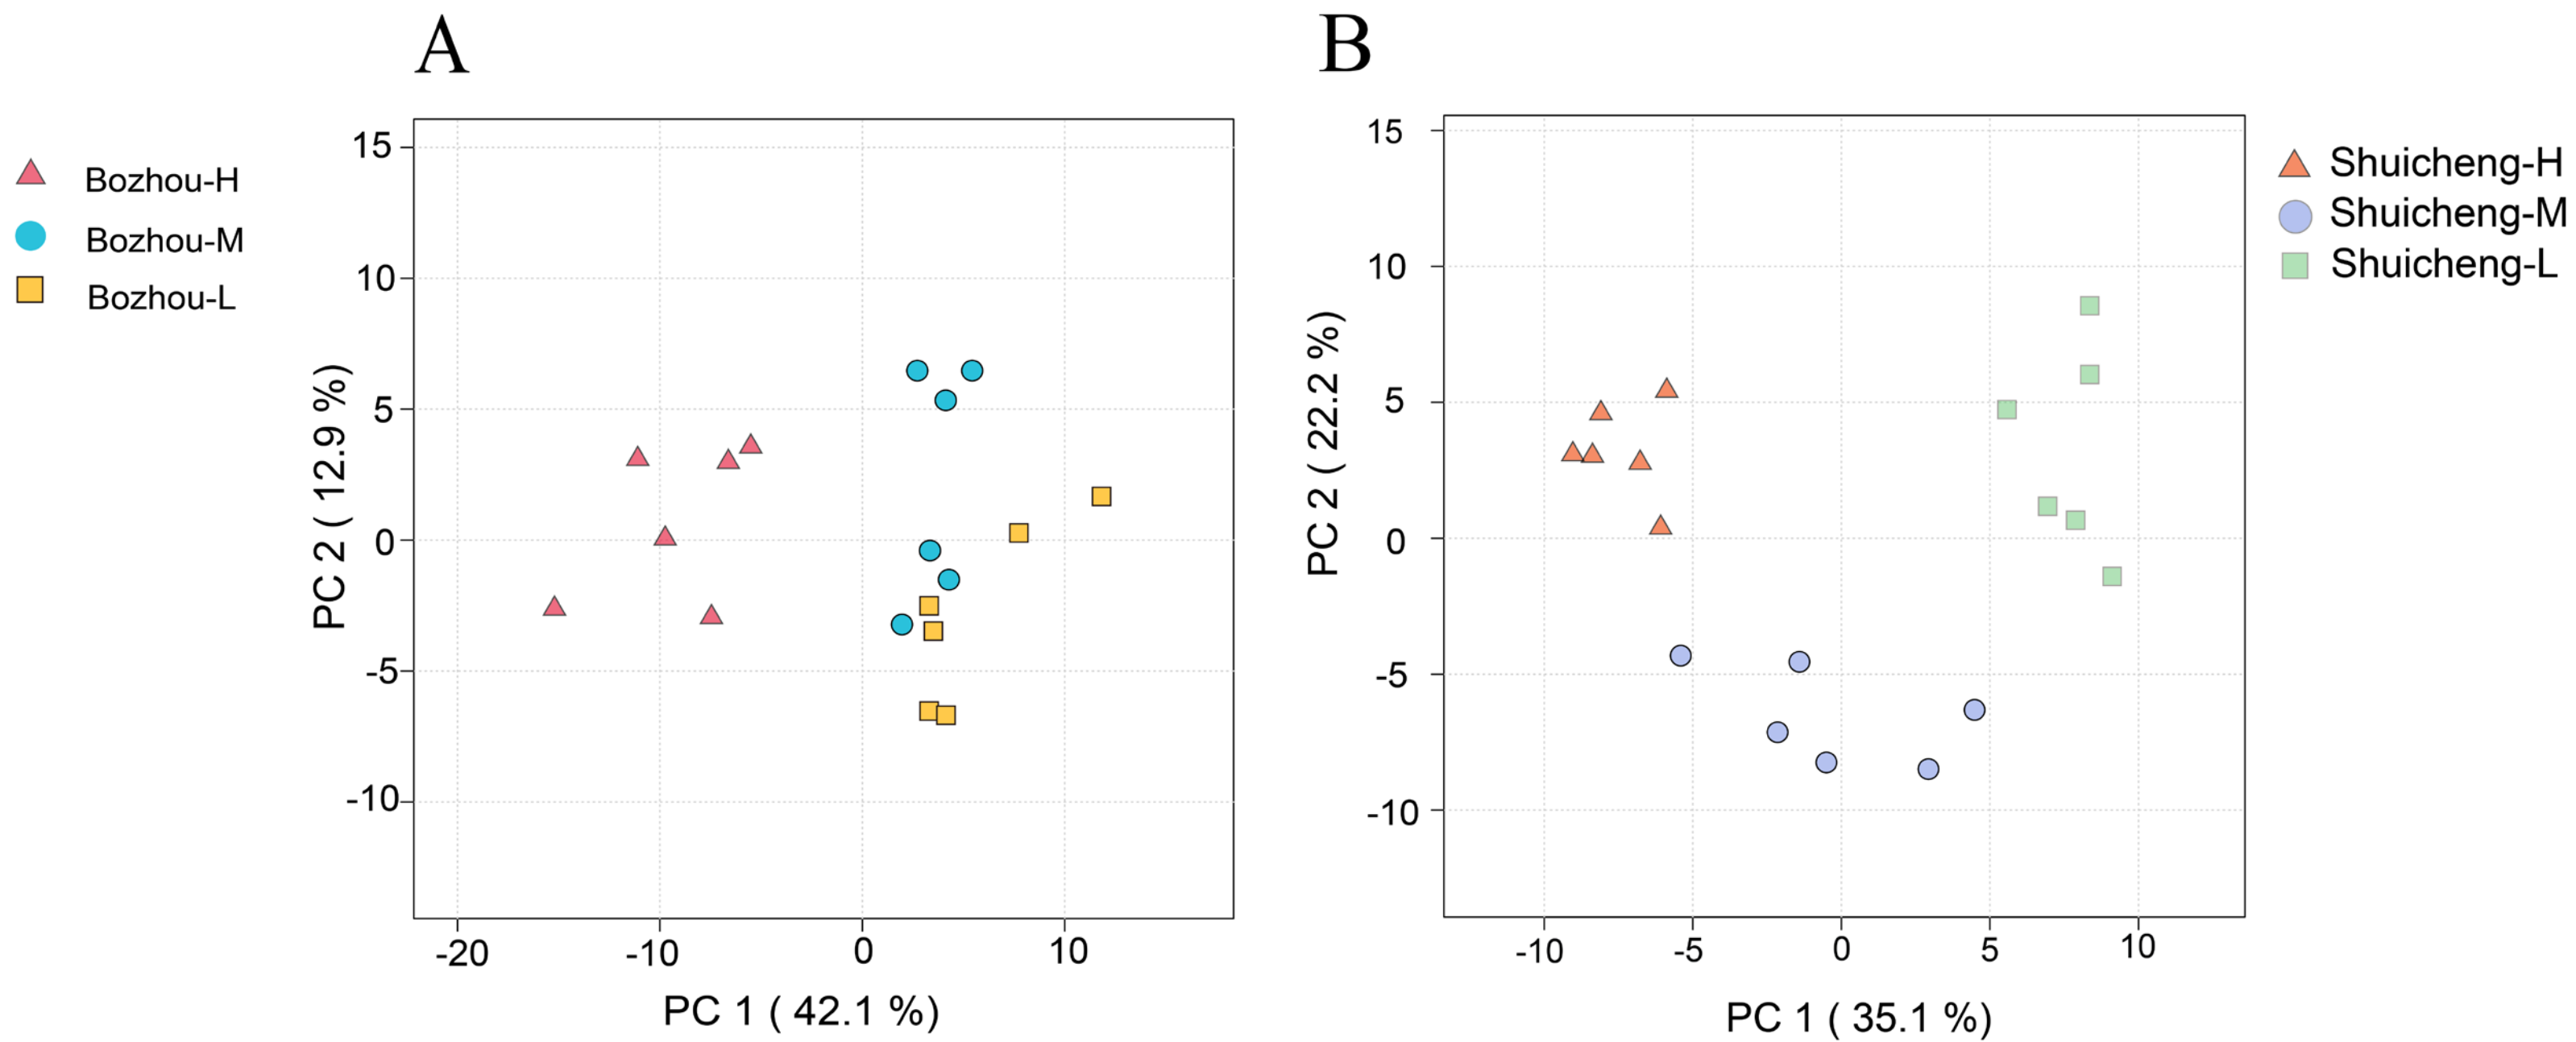

**Figure S2.** (A) PCA analysis of low-, middle- and high-yield in Bozhou. (B) PCA analysis of low-, middle- and high-yield in Shuicheng.

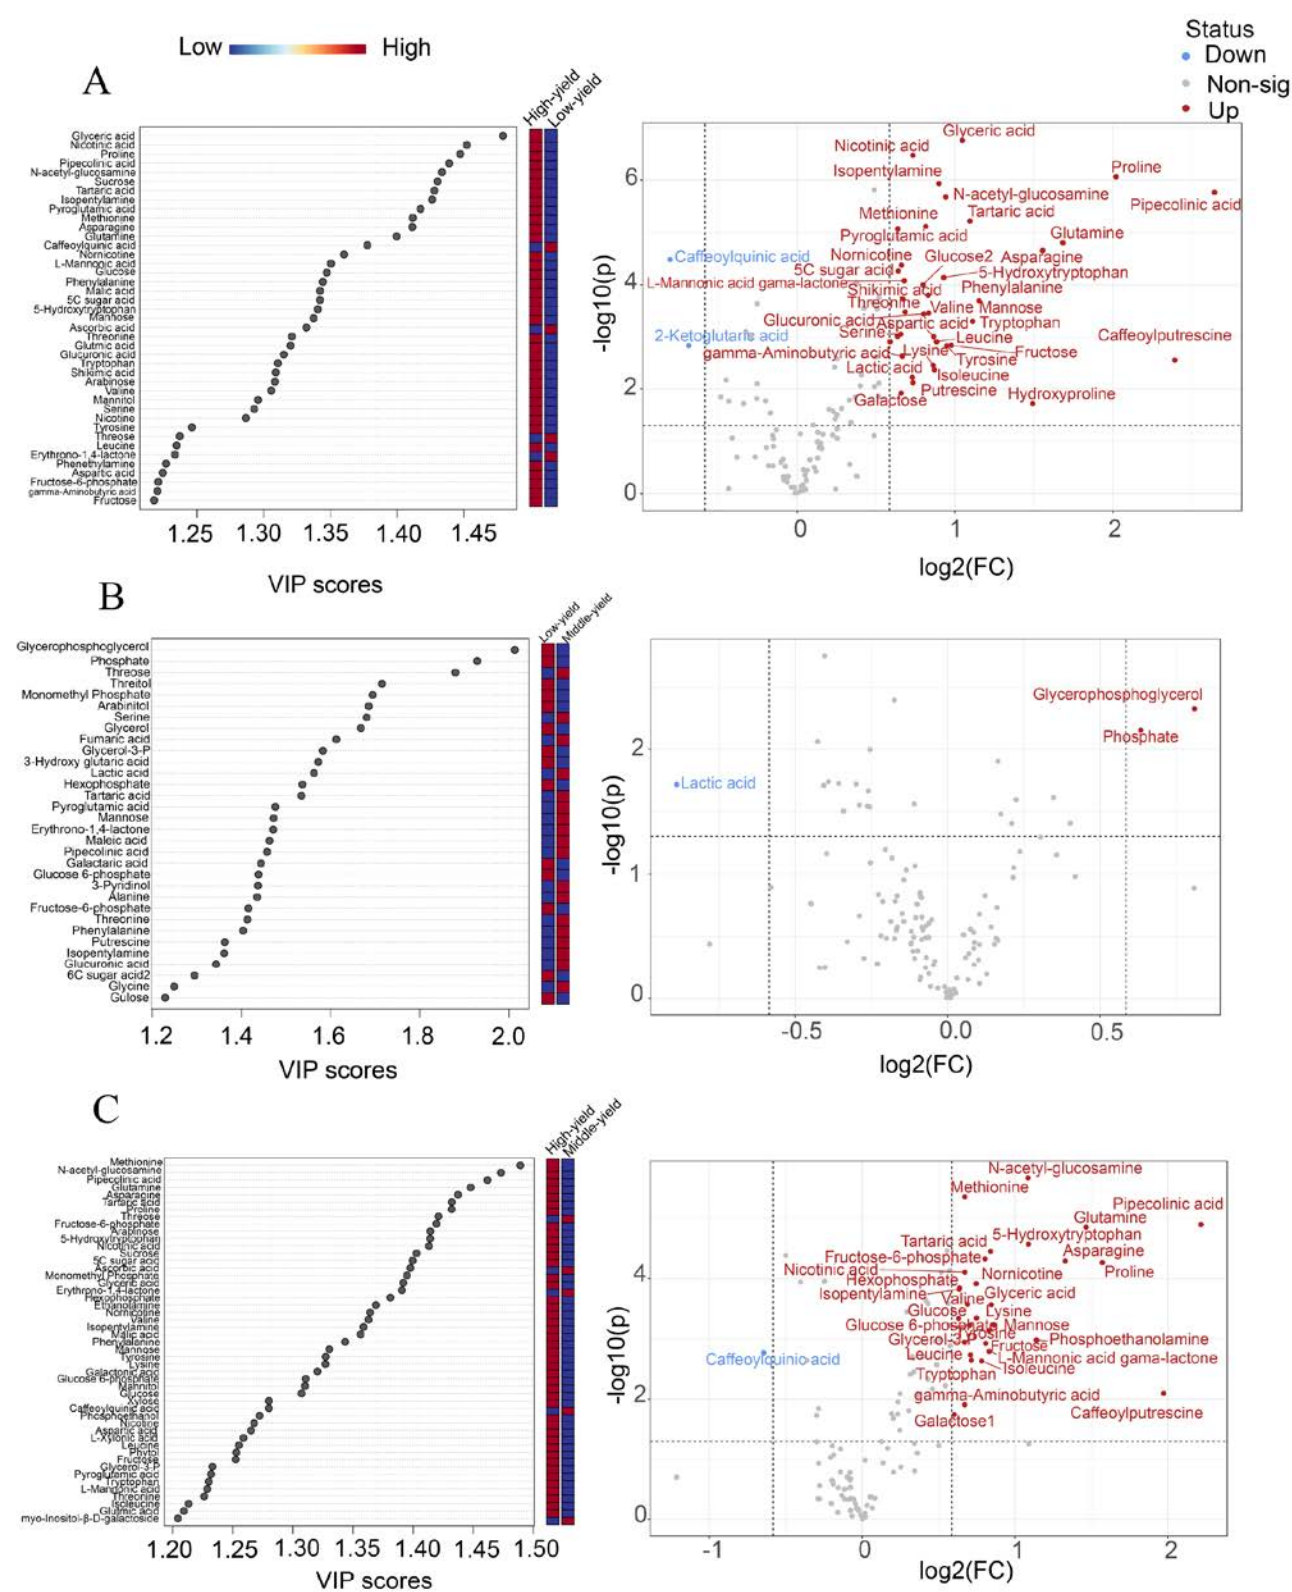

**Figure S3.** Volcanic maps and VIP of characteristic metabolites in Bozhou. (A) high - versus low-yield tobacco leaves (B) middle - versus low-yield (C) high - versus middle-yield.

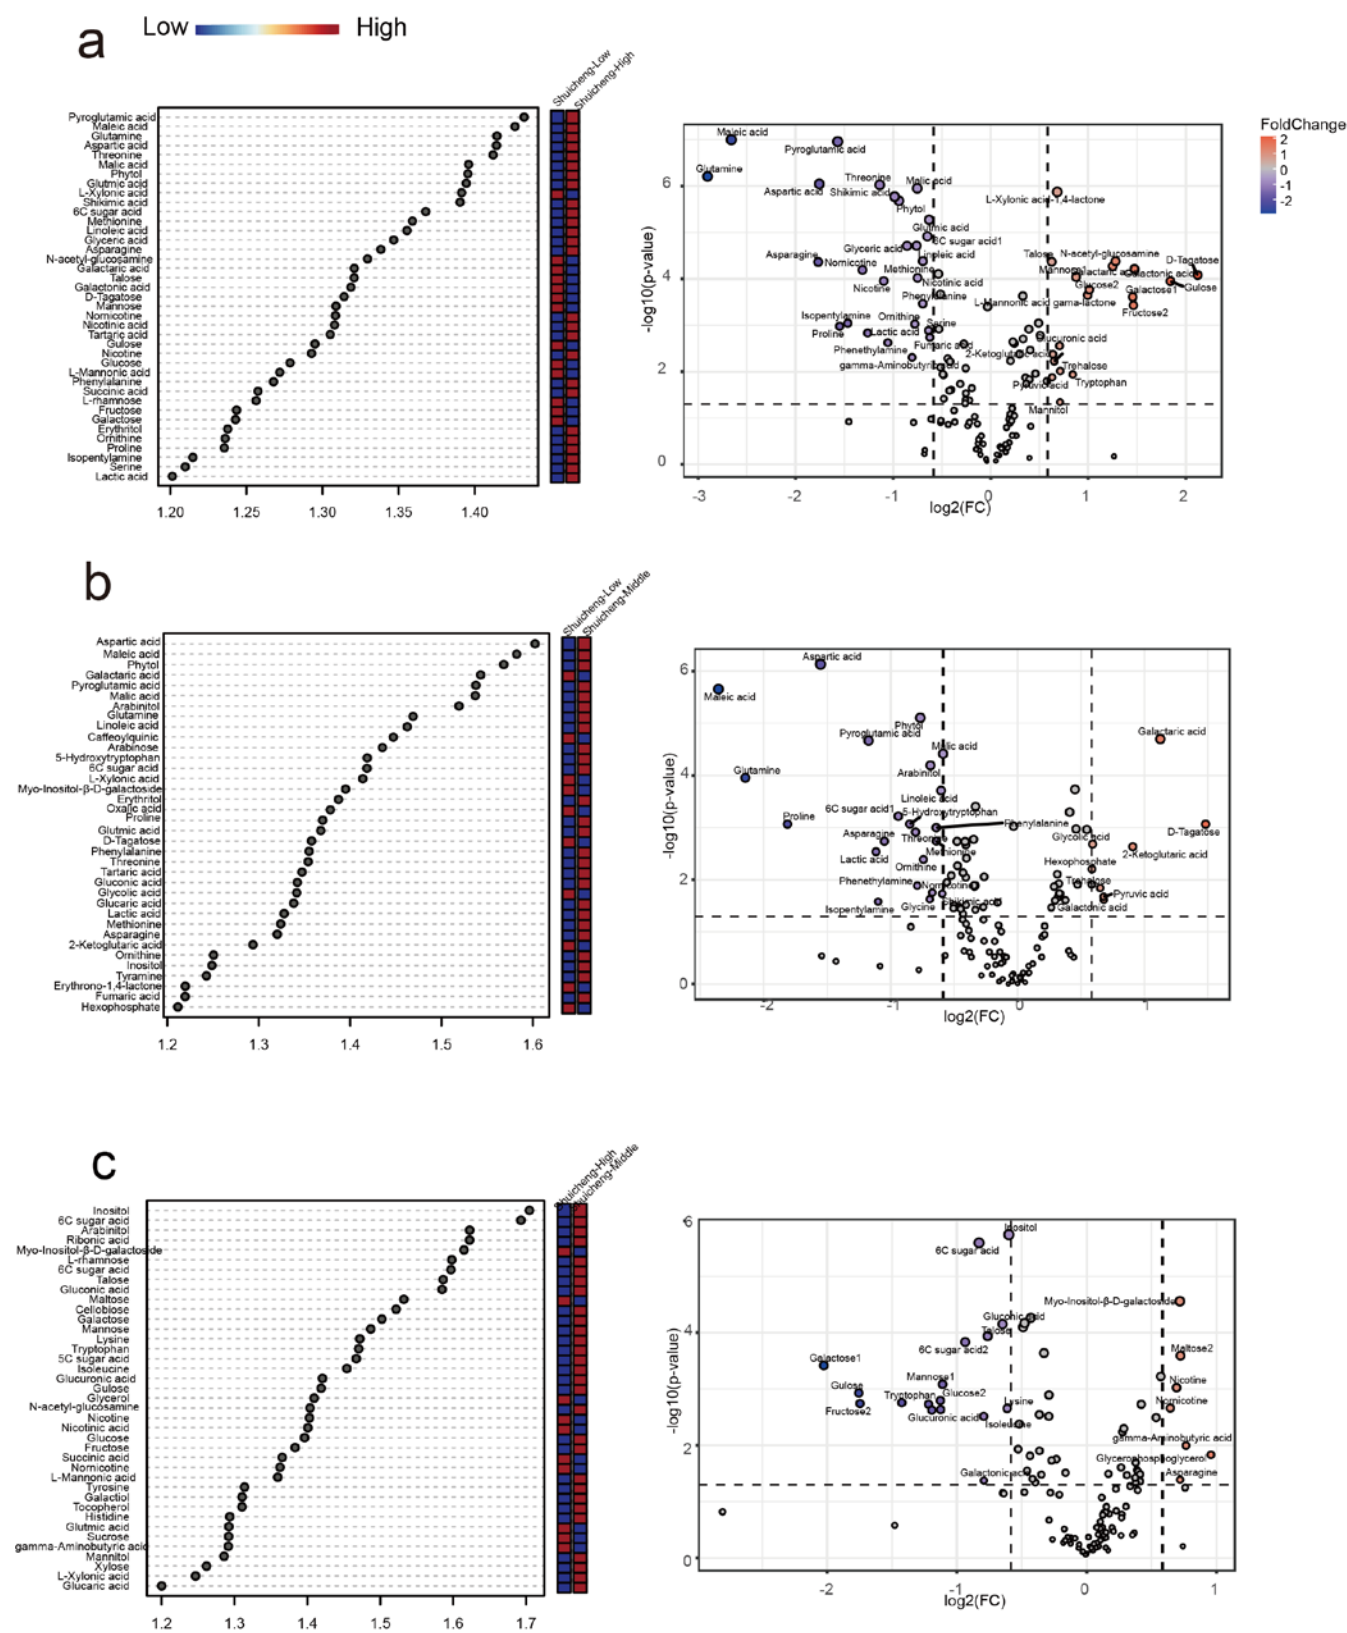

**Figure S4.** Volcanic maps and VIP of characteristic metabolites in Shuicheng. (A)high - versus low-yield tobacco leaves (B) middle - versus low-yield (C) high - versus middle-yield.

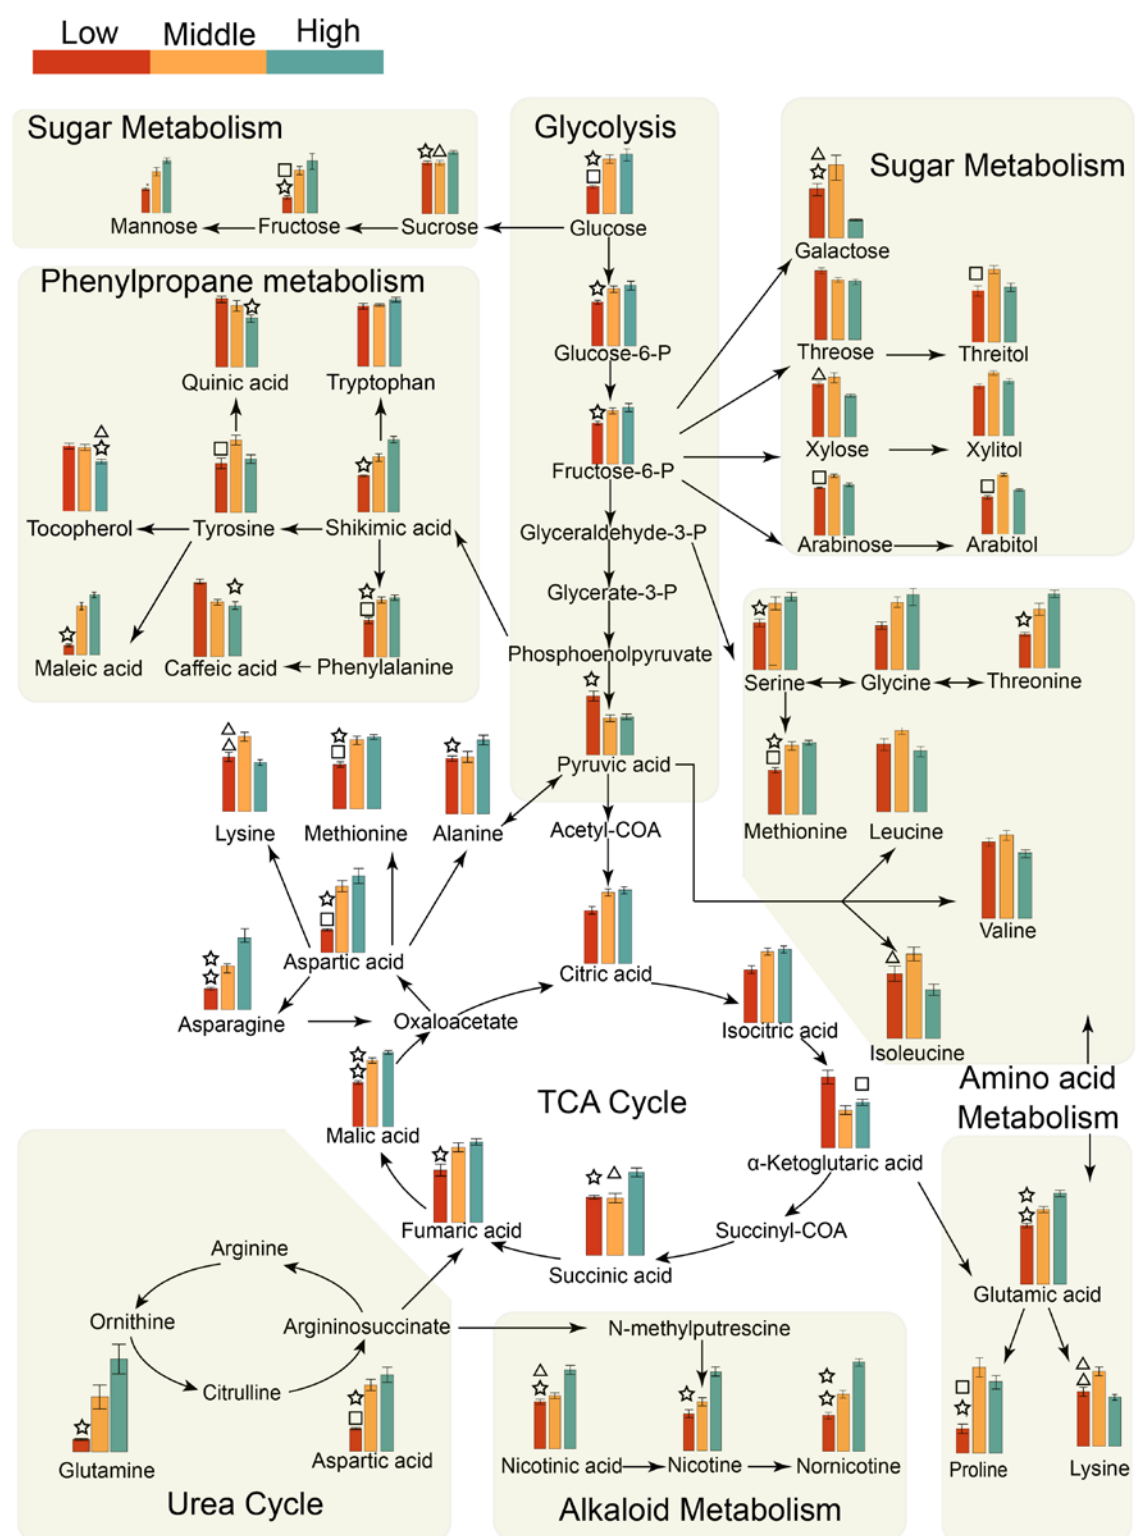

**Figure S5.** Metabolic pathway plot of the differential metabolites among the three yields in Shuicheng. Red, yellow, and green indicate the relative concentrations of metabolites in the low-yield, middle-yield, and high-yield.  $\Delta$ , \* and  $\square$  represent p values of metabolites using nonparametric tests that were less than 0.05 in low-yield vs high-yield, low-yield vs middle-yield and middle-yield vs high-yield, respectively.
